# Supplementary material for: The development and validation of a non-invasive prediction model of hyperuricemia based on modifiable risk factors: baseline findings of a health examination population cohort
Source: Royal Society of Chemistry journal article supplement (doi:10.1039/d3fo01363d), 2023-01-01
Supplement: d3fo01363d1.pdf [file d3fo01363d1.pdf]

Supplementary materials

Table S1 Features and reference levels listed in the logistic, random forest and XGBoost models

| <b>Independent variables</b>         | <b>Format</b> | <b>Classifications</b>              |
|--------------------------------------|---------------|-------------------------------------|
| <b>Age</b>                           | Grouped       | 18- (reference)                     |
|                                      |               | 30-                                 |
|                                      |               | 40-                                 |
|                                      |               | 50-                                 |
|                                      |               | 60-                                 |
|                                      |               | ≥70                                 |
| <b>Sex</b>                           | Grouped       | Women (reference)                   |
|                                      |               | Men                                 |
| <b>BMI</b>                           | Grouped       | Under/normal weight (reference)     |
|                                      |               | Overweight                          |
|                                      |               | Obesity                             |
| <b>Waist circumference</b>           | Continuous    | Not applicable (NA)                 |
| <b>Cigarette smoking</b>             | Grouped       | Never (reference)                   |
|                                      |               | Quit smoke                          |
|                                      |               | Current smoke                       |
| <b>Alcohol drink</b>                 | Grouped       | Never (reference)                   |
|                                      |               | Ever                                |
| <b>Fiber-rich food intake</b>        | Grouped       | Never                               |
|                                      |               | Occasionally                        |
|                                      |               | Often (reference)                   |
| <b>Eating speed</b>                  | Grouped       | Very fast                           |
|                                      |               | A little bit fast                   |
|                                      |               | Normal speed                        |
|                                      |               | Slow (reference)                    |
| <b>Beverage preference</b>           | Grouped       | Boiled water (reference)            |
|                                      |               | Tea and coffee                      |
|                                      |               | Sugary drinks                       |
|                                      |               | Coffee                              |
|                                      |               | Green tea                           |
|                                      |               | Other kind of teas                  |
| <b>Breakfast frequency</b>           | Grouped       | Never                               |
|                                      |               | 1-2 times per week,                 |
|                                      |               | 3-5 times per week,                 |
|                                      |               | Every day (reference)               |
| <b>Dairy products intake</b>         | Grouped       | Never or less than 3 times per week |
|                                      |               | 3-5 times per week,                 |
|                                      |               | 6-7 times per week                  |
|                                      |               | > 7 times per week (reference)      |
| <b>The frequency of stay up late</b> | Grouped       | Often                               |
|                                      |               | Occasionally                        |

|                                  |         |                   |
|----------------------------------|---------|-------------------|
|                                  |         | Never (reference) |
| <b>Daily cell phone use time</b> | Grouped | < 2h              |
|                                  |         | 2-5 h             |
|                                  |         | More than 5h      |
| <b>Hypertension</b>              | Grouped | Yes               |
|                                  |         | No (reference)    |
